# Supplementary material
Source: Springer Nature journal article supplement (https://www.springermedizin.de/resource/supplementary/12984_2007_138_MOESM6_ESM.pdf/9605382)

Mean Hip Power Output (mW)

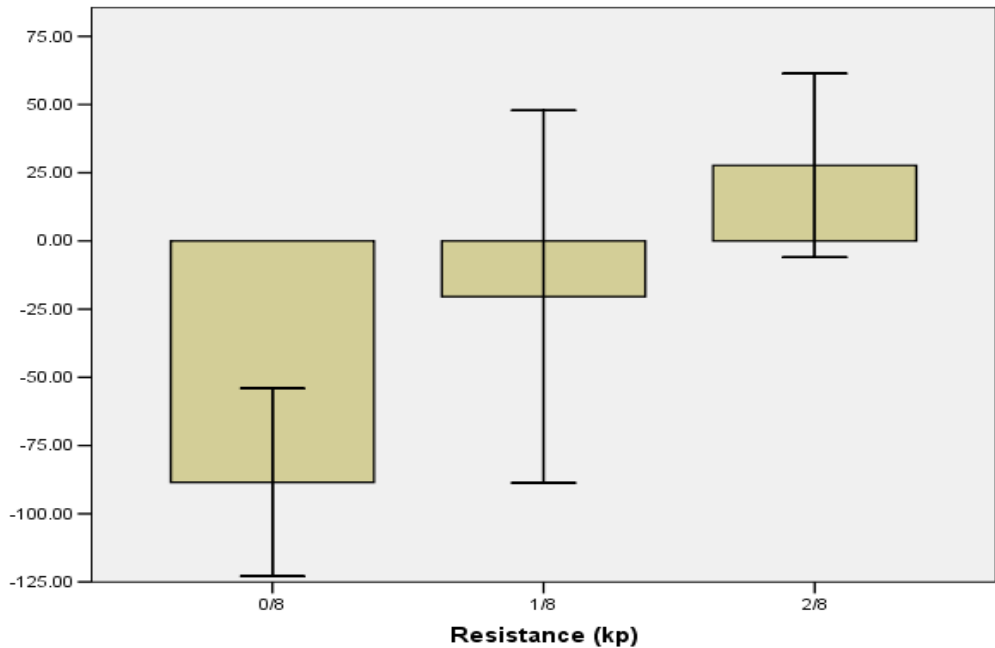

Supplement: MOESM6 [file 9605382]
